# Supplementary material for: Enhanced reactive CO2 species formation via V2O5-promoted Ni/KCC-1 for low temperature activation of CO2 methanation
Source: Royal Society of Chemistry journal article supplement (doi:10.1039/c8re00312b), 2019-01-01
Supplement: c8re00312b1.pdf [file c8re00312b1.pdf]

**Table S1** Coded levels for independent variables used in the experimental design

| Independent variables                 | Symbol | Coded levels |     |     |
|---------------------------------------|--------|--------------|-----|-----|
|                                       |        | -1           | 0   | +1  |
| Reaction temperature (K)              | A      | 623          | 673 | 723 |
| Reduction temperature (K)             | B      | 573          | 773 | 973 |
| H <sub>2</sub> /CO <sub>2</sub> ratio | C      | 2            | 4   | 6   |

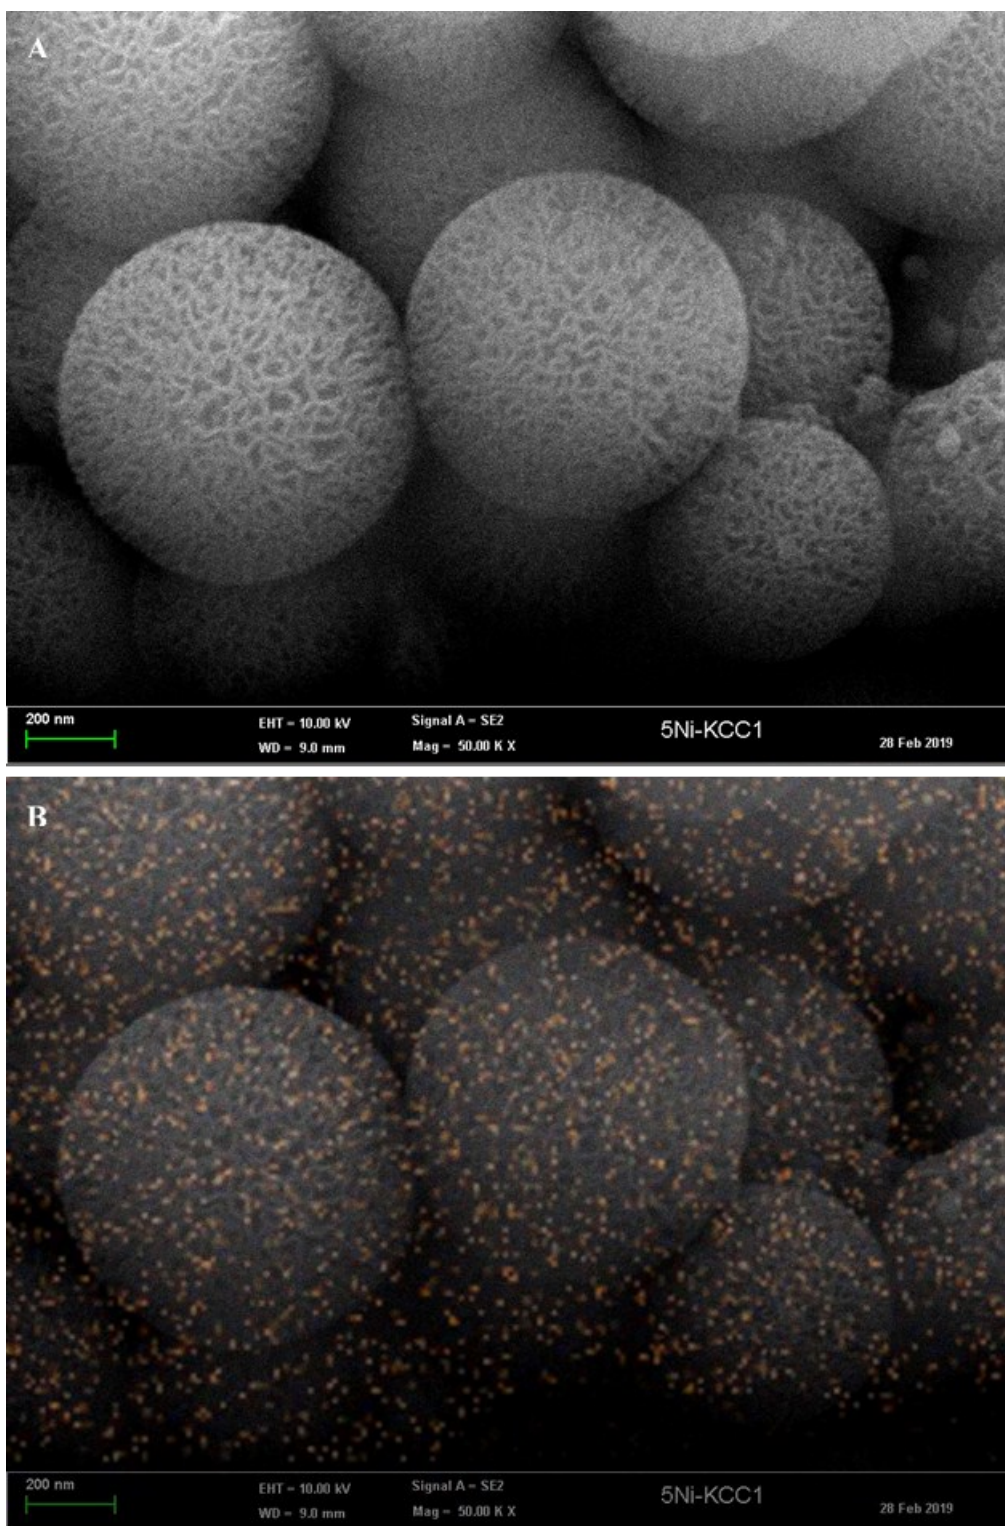

**Figure S1** (A) FESEM image and (B) Ni elemental mapping of 5 Ni/KCC-1

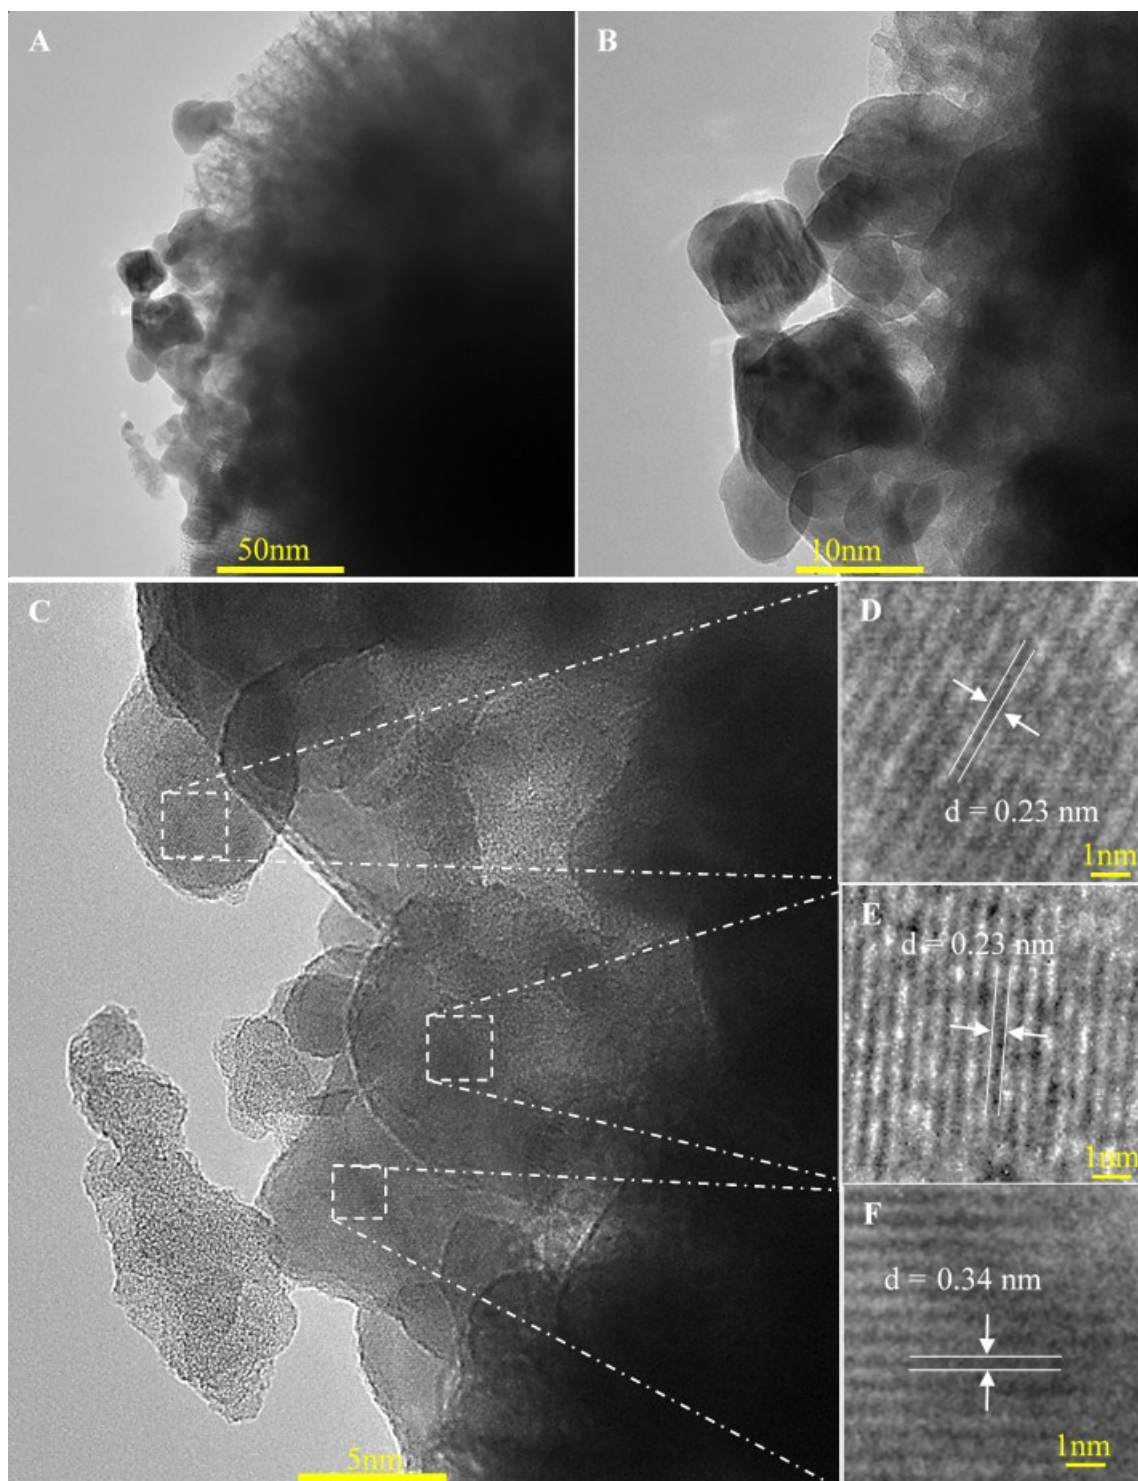

**Figure S2** (A-C) TEM image and (D-F) magnified TEM image showing associated lattice planes of 7.5V<sub>2</sub>O<sub>5</sub>-Ni/KCC-1

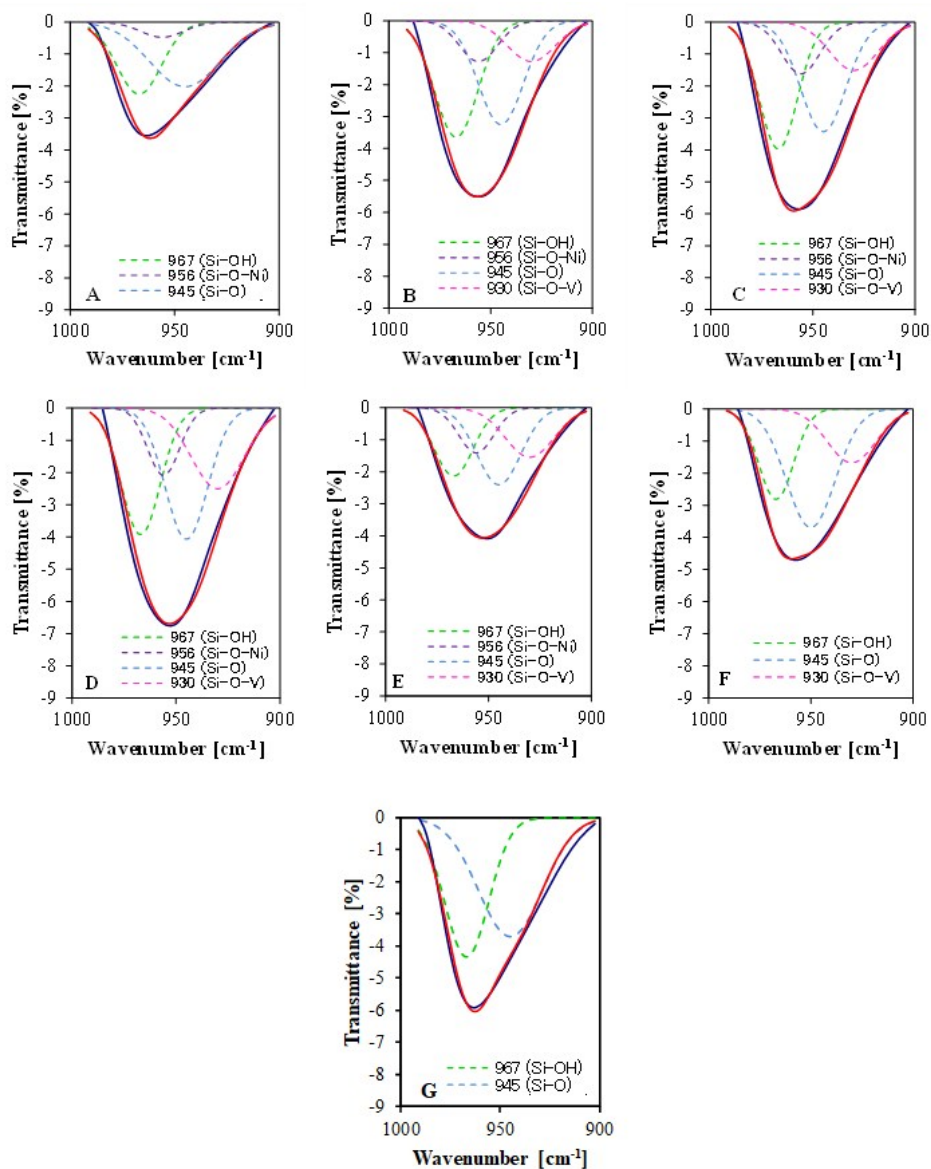

**Figure S3** FTIR spectra and Gaussian Curve fitting of band at  $960\text{ cm}^{-1}$  of (a) KCC-1, (b)  $5\text{Ni/KCC-1}$ , (c)  $2.5\text{V}_2\text{O}_5\text{-Ni/KCC-1}$ , (d)  $5\text{V}_2\text{O}_5\text{-Ni/KCC-1}$ , (e)  $7.5\text{V}_2\text{O}_5\text{-Ni/KCC-1}$ , (f)  $10\text{V}_2\text{O}_5\text{-Ni/KCC-1}$  and (g)  $5\text{V}_2\text{O}_5\text{/KCC-1}$

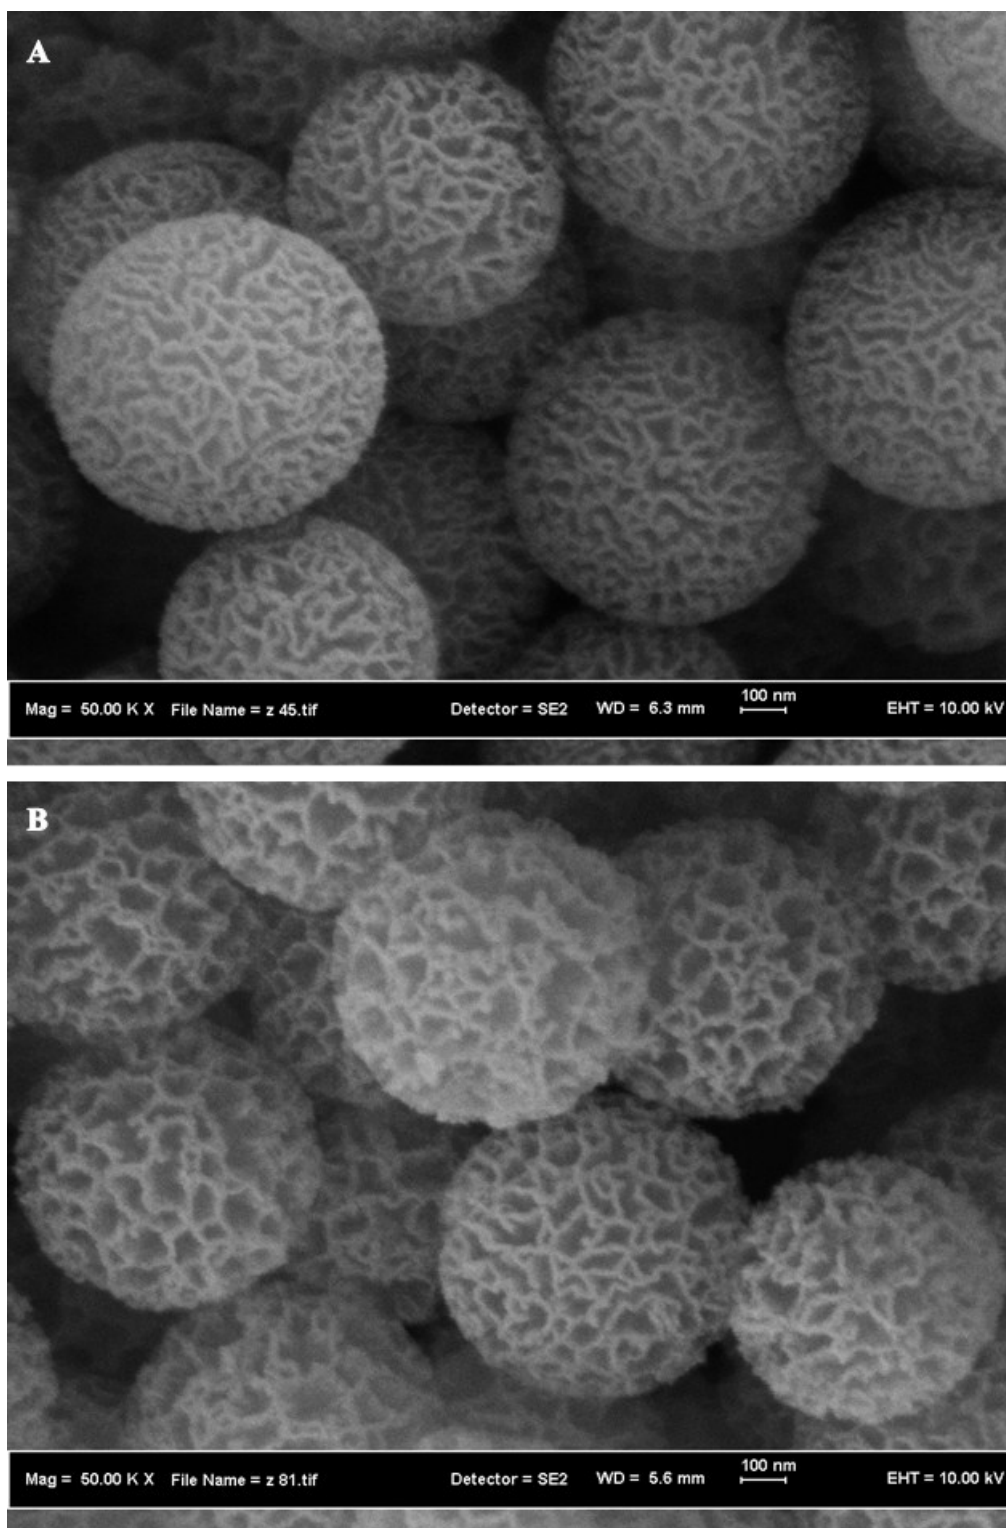

**Figure S4** FESEM image of (A) KCC-1 and (B)  $10\text{V}_2\text{O}_5\text{-Ni/KCC-1}$

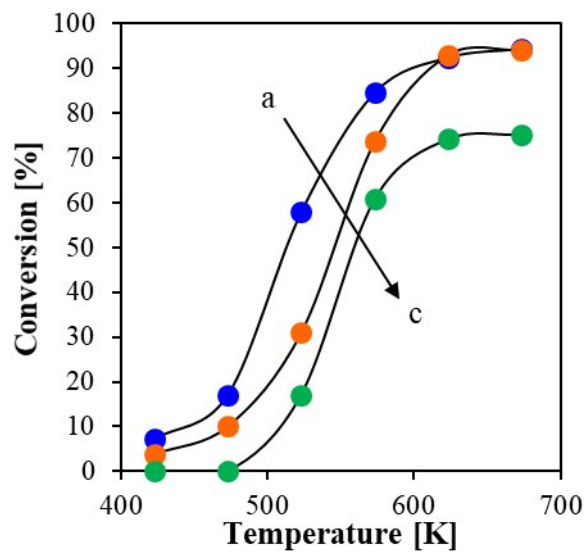

**Figure S5** CO<sub>2</sub> conversion at 473–623 K over (a) co-impregnated V<sub>2</sub>O<sub>5</sub> and Ni over KCC-1, (b) Ni impregnated over V<sub>2</sub>O<sub>5</sub>/KCC-1 and (c) V<sub>2</sub>O<sub>5</sub> impregnated over Ni/KCC-1

**Table S2** Experimental design and response value for different conditions

| Run no. | Factor                      |                              |                                          | Response (%) |           |
|---------|-----------------------------|------------------------------|------------------------------------------|--------------|-----------|
|         | A, Reaction temperature (K) | B, Reduction temperature (K) | C, H <sub>2</sub> /CO <sub>2</sub> ratio | Observed     | Predicted |
| 1       | 623                         | 573                          | 2                                        | 52.52        | 52.12     |
| 2       | 623                         | 573                          | 6                                        | 63.21        | 63.29     |
| 3       | 623                         | 973                          | 2                                        | 48.32        | 50.36     |
| 4       | 623                         | 973                          | 6                                        | 59.17        | 60.21     |
| 5       | 723                         | 573                          | 2                                        | 74.95        | 74.25     |
| 6       | 723                         | 573                          | 6                                        | 84.86        | 83.17     |
| 7       | 723                         | 973                          | 2                                        | 73.68        | 73.95     |
| 8       | 723                         | 973                          | 6                                        | 80.79        | 81.54     |
| 9       | 623                         | 773                          | 4                                        | 76.43        | 73.68     |
| 10      | 723                         | 773                          | 4                                        | 94.03        | 95.41     |
| 11      | 673                         | 573                          | 4                                        | 80.51        | 83.22     |
| 12      | 673                         | 973                          | 4                                        | 85.61        | 81.53     |
| 13      | 673                         | 773                          | 2                                        | 88.10        | 86.91     |
| 14      | 673                         | 773                          | 6                                        | 96.47        | 96.29     |
| 15      | 673                         | 773                          | 4                                        | 93.93        | 95.58     |
| 16      | 673                         | 773                          | 4                                        | 94.48        | 95.58     |
